# Supplementary material for: Progressive Ataxia, Memory Impairments, and Seizure Episodes in Spna2 R1098Q Mouse Variant Affecting Alpha II Spectrin’s Scaffold Stability
Source: MDPI journal article supplement (doi:10.3390/brainsci13020261), 2023-02-03
Supplement: s1 [file s1]

# Progressive ataxia, memory impairments, and seizure episodes in *Spna2* R1098Q mouse variant affecting alpha II spectrin's scaffold stability.

Michał Zalas<sup>1</sup>, Joanna Skrzymowska<sup>1</sup>, Apolonia Miążek<sup>2</sup> and Arkadiusz Miazek<sup>1,3</sup>

**Supplementary Materials:** The following supporting information can be downloaded at: [www.mdpi.com/xxx/s1](http://www.mdpi.com/xxx/s1), Figure S1: title; Table S1: title; Video S1: title.

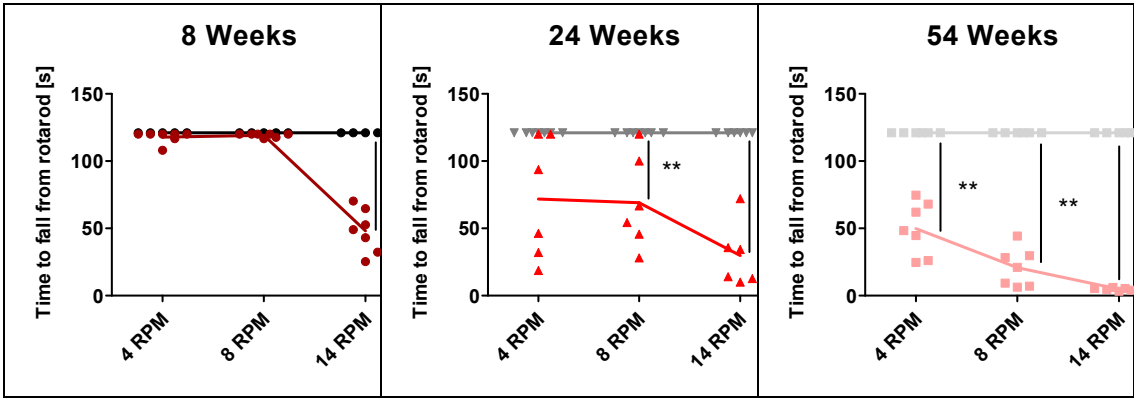

**Figure S1.** The rotarod test. Differences in times to fall off the constant speed rotarod between age-matched groups of R1098Q and WT controls are shown. Each dot represents the mean latency time the on rotarod achieved by the individual mouse. The 8-, 24, and 54-week-old groups of R1098Q mice are marked in red (●, ●, ●), and WT control littermate groups of mice are marked in black (●, ●, ●). The statistics were calculated using the Mann-Whitney test. Statistically significant differences between R1098Q and WT mice are marked with asterisks. (\* p < 0.05, \*\* p < 0.01, \*\*\* p < 0.001)

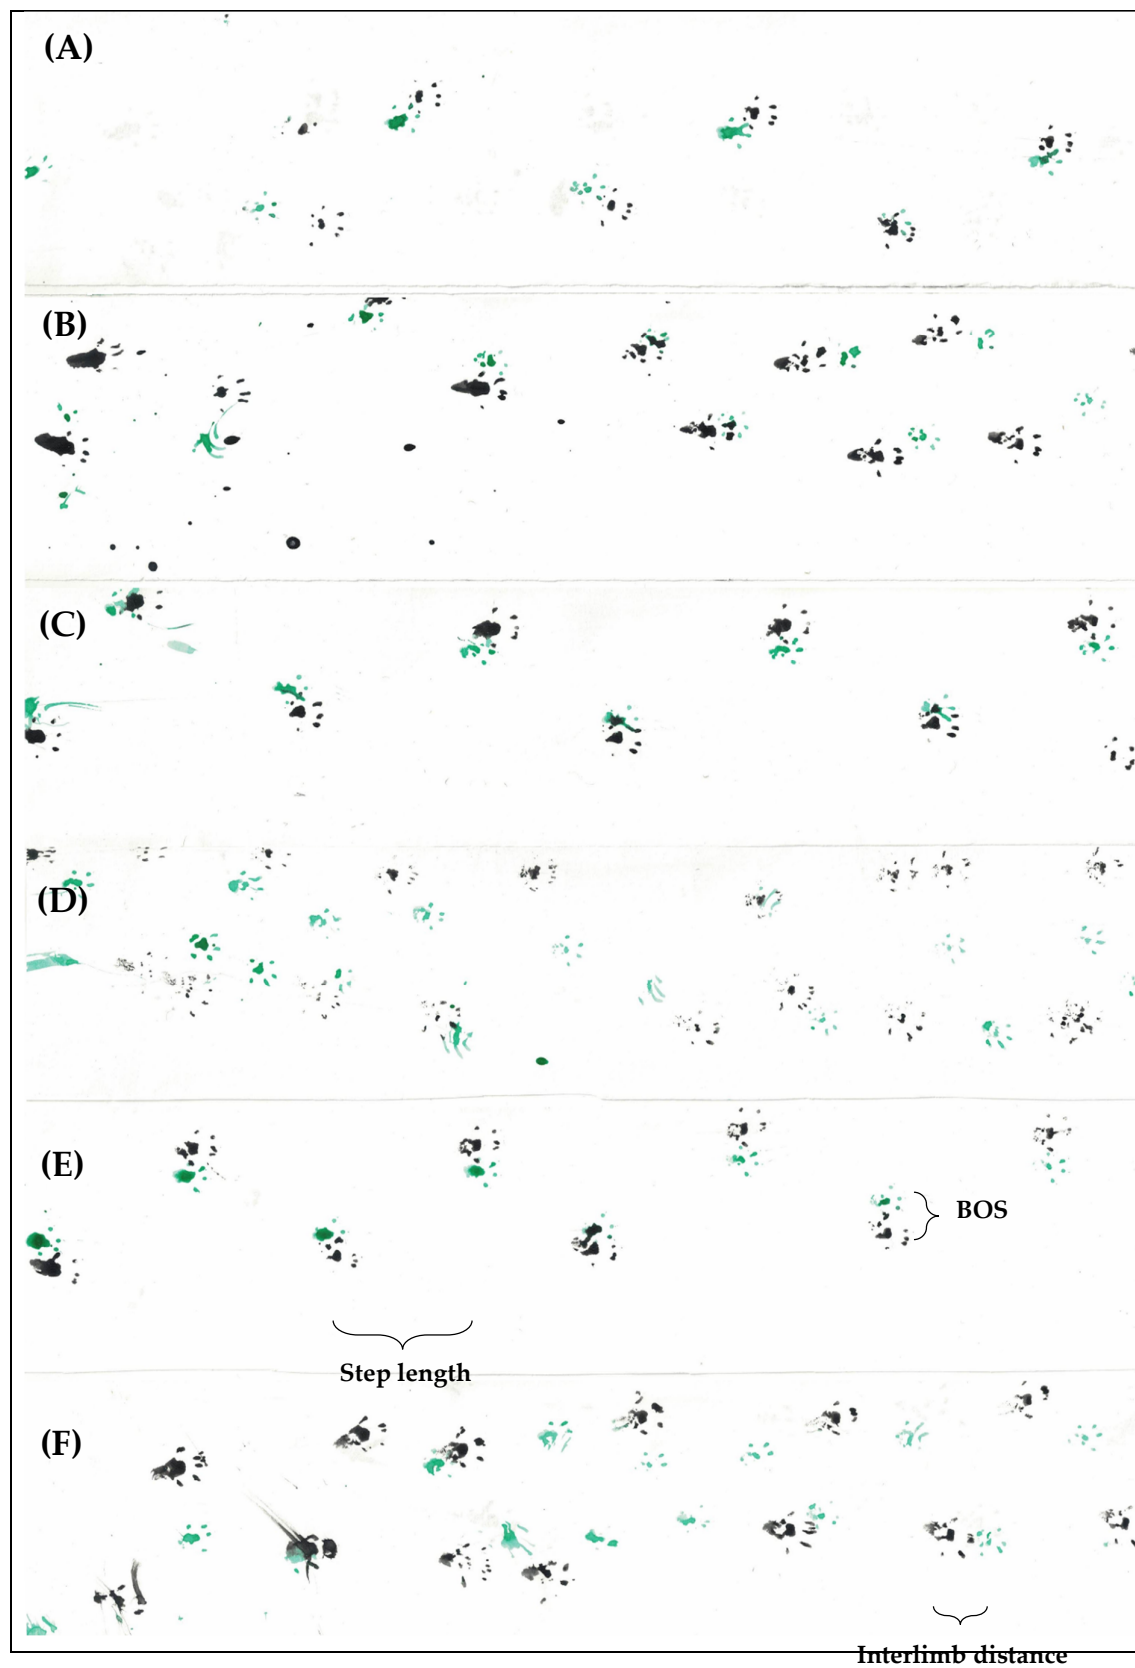

**Figure S2.** Representative images of footprints on the runway tunnel. The figure shows examples of images recorded for male WT and R1098Q mice from three age groups: (A) - 8 week-old WT; (B) - 8week-old R1098Q; (C) - 24 week-old WT;

**(D)** - 24 week-old R1098Q; **(E)** - 54 week-old WT; **(F)** - 54 week-old R1098Q. The graph also depicts parameters analysed.

Supplementary video recordings of rotarod-induced seizures:

  
VID\_20201008\_135309.mp4

  
VID\_20201008\_135608.mp4

  
VID\_20201008\_140641\_L.mp4

  
VID\_20201008\_140641\_P.mp4

  
VID\_20201008\_141324.mp4

  
VID\_20201008\_141728-samice KS i WT kręcą się.mp4

  
VID\_20201008\_173000-samce WT+KS spazmy po upadku.mp4

  
VID\_20201008\_174931-samica i samiec KS (915 i 921) L.mp4

  
VID\_20201008\_174931-samica i samiec KS (915 i 921) P.mp4

  
VID\_20201008\_180832-samica KS 917 długi napad.mp4

Table S1`Post recording analysis of rotarod-induced seizures in 6 wks old R1098Q mice

| Seizure duration<br>[seconds] | Gender<br>(Female/Male) | Tonic movements | Clonic movements | Barrel rolls/wild<br>jumping |
|-------------------------------|-------------------------|-----------------|------------------|------------------------------|
| 3,5                           | F                       | -               | +                | +                            |
| 5                             | F                       | +               | +                | +                            |
| 4                             | F                       | +               | -                | -                            |
| 13                            | F                       | -               | +                | +                            |
| 8                             | F                       | +               | +                | +                            |
| 4                             | F                       | +               | +                | +                            |
| 6                             | M                       | +               | +                | +                            |
| 7                             | F                       | +               | +                | +                            |
| 35                            | M                       | +               | +                | +                            |
| 65                            | F                       | +               | +                | +                            |
